# Supplementary material for: Dual-shape memory effect in radiation crosslinked thermoplastic blends: fabrication, optimization and mechanisms
Source: Royal Society of Chemistry journal article supplement (doi:10.1039/c5ra11044k), 2015-01-01

## Supporting information

**(S01)** The SEM micrograph of cryo-fractured surfaces of the non-irradiated PP90 sample.

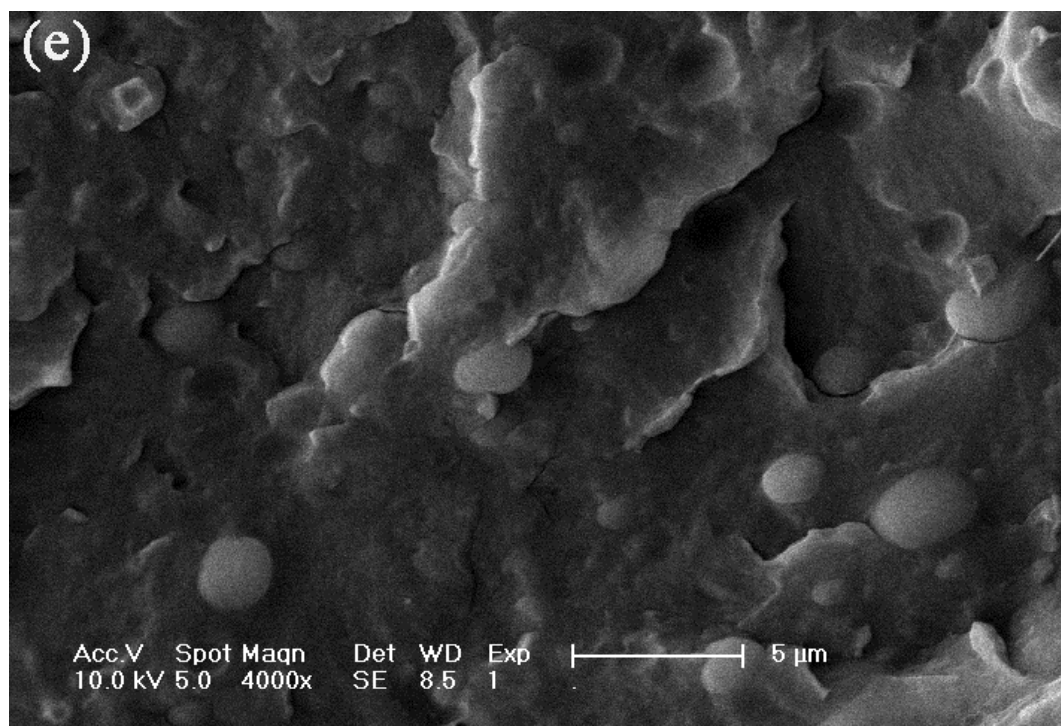

Supplement: c5ra11044k1.pdf [file c5ra11044k1.pdf]
